# Supplementary material
Source: PubMed Central journal article supplement (PMC4177011)
Supplement: NIHMS621286-supplement-2.pdf [file NIHMS621286-supplement-2.pdf]

|                                 | Old PIB-               | Old PIB+               | Young                 |
|---------------------------------|------------------------|------------------------|-----------------------|
| N                               | 33                     | 16                     | 15                    |
| Age <sup>a</sup>                | 76.8±5.3(68-90)        | 75.6±4.7(70-84)        | 23.6±2.0(20-28)       |
| CVLT15FR <sup>b</sup>           | 46.3±11.1 (26-69)      | 49.2±12.4 (35-73)      | 56.8±8.60(34-68)      |
| CVLTSDFR <sup>b</sup>           | 9.5±3.3 (2-16)         | 10.5±2.9(6-16)         | 12.7±2.2 (8-15)       |
| CVLTSDCR                        | 11.4±2.7 (6-16)        | 11.8±2.9(7-16)         | 13.1±1.7 (9-15)       |
| CVLTLDFR <sup>b</sup>           | 10.2±3.2 (3-16)        | 11.1±2.9(6-16)         | 13.2±2.0(9-16)        |
| CVLTLCDR <sup>b</sup>           | 11.2±2.9(6-16)         | 11.7±2.6 (7-16)        | 13.5±1.9(9-16)        |
| TrailB <sup>a</sup>             | 79.5±31.9 (1.1-187.1)  | 77.8±24.6 (41.0-139.1) | 48.4±13.5(28.0-73.3)  |
| TrailBminusA                    | 42.4±29.8 (35.1-135.8) | 38.6±16.1(15.3-75.2)   | 26.3±11.2(13.8-47.1)  |
| Stroop <sup>a</sup>             | 45±13.1 (22-81)        | 52.1±12.4 (32-71)      | 63.5±12.5(37-80)      |
| FASTotal                        | 48.7±8.6(33-68)        | 45.5±13.9 (24-69)      | 47.6±10.0(33-68)      |
| VegetablesTotal                 | 13.5±3.8 (5-24)        | 14.5±6.2(8-31)         | 16.5±3.8(9-23)        |
| AnimalsTotal                    | 19.4±4.9(8-29)         | 21.1±8.5(12-46)        | 23.4±5.2(17-36)       |
| DigitSymbol <sup>a</sup>        | 54.9±13.2(6-78)        | 59.7±13.3 (42-92)      | 82.3±15.7(56-111)     |
| DSForward                       | 8.8±2.5(4-14)          | 8.5±2.4(5-14)          | 8.7±2.3(5-12)         |
| DSBackward                      | 7.9±2.1 (5-13)         | 8.2±2.3 (4-12)         | 8.1±2.0(6-12)         |
| LMAplusB1 <sup>a</sup>          | 27.5±5.2(17-39)        | 25.7±5.0(17-34)        | 31.9±7.1(15-41)       |
| VRIRecallTotal <sup>a</sup>     | 71.3±13.2 (39-93)      | 72.7±12.8 (48-91)      | 85.9±9.6(58-97)       |
| VRIRecallTotal <sup>a</sup>     | 53.1±17.5 (21-94)      | 57.1±19.0 (28-90)      | 75.5±19.7(25-95)      |
| VRRecognitionTotal <sup>a</sup> | 43.2±2.9 (37-48)       | 43.7±3.2(37-47)        | 46.6±2.4(39-48)       |
| VRRetention                     | 74.1±19.2(41.9-113.3)  | 77.3±17.1(48.4-100)    | 86.9±19.0(43.1-104.4) |

Values are Mean ± S.D.(Min, Max)

<sup>a</sup> Young subjects are significantly different from both PIB+ and PIB- older subjects,  $p < 0.05$ ; no multiple comparison correction.

<sup>b</sup> Young subjects performed better than PIB- older subjects,  $p < 0.05$ ; no multiple comparison correction.

CVLT: California Verbal Learning Test; FR: Free recall; CR: Cued recall; SD: Short delay; LD: Long delay; DS: Digit span; LM: logical memory; Stroop: Stroop correct in 60s; VR: Visual reproduction.

### Supplementary Table 1.

#### Comparison of neuropsychological test scores by group.

Group scores were compared for all subjects included in the fMRI analysis. Seven young subjects did not complete neuropsychological testing. Young subjects differed from older subjects on multiple neuropsychological measures. However, no differences were found between PIB+ and PIB- groups.

|                        | <b>Excluded</b>       | <b>Included</b>        |
|------------------------|-----------------------|------------------------|
| Gist Performance       | <45%                  | >45%                   |
| N                      | 5                     | 49                     |
| Age <sup>a</sup>       | 81.8+4.76(74–86)      | 76.224+5.1529(68–90)   |
| CVLT15FR               | 42+9.3(27–51)         | 47.265+11.5358(26–73)  |
| CVLTSDFR               | 7.6+3.2(3–11)         | 9.878+3.1334(2–16)     |
| CVLTSDCR               | 9.2+2.0(6–11)         | 11.49+2.7623(6–16)     |
| CVLTLDFR               | 8.4+2.1(5–10)         | 10.5+3.1 (3–16)        |
| CVLTLD CR <sup>b</sup> | 8.8+1.6(7–11)         | 11.3+2.8(6–16)         |
| TrailB                 | 75.9+21.0(44.7–100.7) | 78.9+29.5(1.1–187.1)   |
| TrailBminusA           | 46.8+18.5(22.8–72.1)  | 41.1+26.0(–35.1–135.8) |
| Stroop                 | 43.6+5.7(36–50)       | 47.3+13.2(22–81)       |
| FASTotal               | 49.8+15.0(28–69)      | 47.7+10.5(24–69)       |
| VegetablesTotal        | 11.2+3.0(8–16)        | 13.8+4.6(5–31)         |
| AnimalsTotal           | 18.2+3.1(14–21)       | 19.9+6.2(8–46)         |
| DigitSymbol            | 58.4+8.3(51–72)       | 56.4+13.3(6–92)        |
| DSForward              | 8.4+2.5(5–12)         | 8.7+2.4(4–14)          |
| DSBackward             | 8.6+2.5(7–13)         | 8.0+2.2(4–13)          |
| LMAplusB1              | 26.8+5.5(20–33)       | 26.9+5.1(17–39)        |
| VRIRecallTotal         | 69+18.6(50–95)        | 71.8+13.0(39–93)       |
| VRIRecallTotal         | 58+23.1(35–90)        | 54.3+17.9(21–94)       |
| VRRecognitionTotal     | 42.4+3.5 (39–46)      | 43.396+2.9732(37–48)   |
| VRRetention            | 82.2+14.1(70.–100)    | 75.1+18.4(41.0–113.3)  |

Values are Mean ± S.D.(Min, Max)

<sup>a</sup>  $p < 0.05$ ; no multiple comparison correction.

<sup>b</sup>  $p = 0.05$ ; no multiple comparison correction.

CVLT: California Verbal Learning Test; FR: Free recall; CR: Cued recall; SD: Short delay; LD: Long delay; DS: Digit span; LM: logical memory; Stroop: Stroop correct in 60s; VR: Visual reproduction.

### Supplementary Table 2.

#### Comparison of neuropsychological test scores between subjects included and excluded based on gist performance.

Older subjects' neuropsychological test scores were compared between subjects included and excluded from fMRI analysis due to poor gist performance. Excluded subjects were significantly older than included subjects, but neuropsychological scores were similar on all but one measure (CVLT Long Delay Cued Recall). Of the excluded subjects, 3 were classified as PIB+ and 2 as PIB–.

| Cluster Size (voxels) | X (mm) | Y (mm) | Z (mm) | Z-Score | Hemisphere  | Region                             |
|-----------------------|--------|--------|--------|---------|-------------|------------------------------------|
| <i>Task Positive</i>  |        |        |        |         |             |                                    |
| 93602                 | 34     | -92    | 4      | 21.1    | R           | Occipital Pole                     |
|                       | 34     | -80    | 22     | 21.1    | R           | Superior Lateral Occipital Cortex  |
|                       | 26     | -92    | -4     | 20.6    | R           | Occipital Pole                     |
|                       | 38     | -88    | -2     | 20.4    | R           | Inferior Lateral Occipital Cortex  |
|                       | -30    | -50    | -18    | 20      | L           | Temporal Occipital Fusiform Cortex |
|                       | 34     | -90    | -4     | 19.8    | R           | Inferior Lateral Occipital Cortex  |
|                       | 34     | -44    | -20    | 19.6    | R           | Temporal Occipital Fusiform Cortex |
|                       | -30    | -92    | 0      | 19.4    | L           | Occipital Pole                     |
|                       | 46     | -48    | -18    | 19.3    | R           | Temporal Occipital Fusiform Cortex |
|                       | -38    | -88    | -4     | 19      | L           | Inferior Lateral Occipital Cortex  |
|                       | 18     | -100   | -2     | 18.8    | R           | Occipital Pole                     |
|                       | 28     | -38    | -20    | 18.3    | R           | Temporal Fusiform Cortex           |
|                       | -40    | -88    | 0      | 18.1    | L           | Inferior Lateral Occipital Cortex  |
|                       | 36     | -86    | 12     | 18.1    | R           | Superior Lateral Occipital Cortex  |
|                       | 28     | -50    | -16    | 18      | R           | Temporal Occipital Fusiform Cortex |
| 20                    | -12    | -22    | 10.6   | R       | Hippocampus |                                    |
| <i>Task Negative</i>  |        |        |        |         |             |                                    |
| 10441                 | 2      | 50     | -4     | 9.02    | R           | Paracingulate Gyrus                |
|                       | 2      | 54     | -2     | 8.84    | R           | Paracingulate Gyrus                |
|                       | -4     | 40     | -8     | 8.66    | L           | Paracingulate Gyrus                |
|                       | 0      | 36     | -4     | 8.47    | R           | Anterior Cingulate Gyrus           |
|                       | -4     | 40     | -2     | 8.38    | L           | Anterior Cingulate Gyrus           |
| 8900                  | 8      | -82    | 24     | 9.57    | R           | Cuneal Cortex                      |
|                       | 6      | -80    | 28     | 9.02    | R           | Cuneal Cortex                      |
|                       | 0      | -78    | 32     | 8.56    | R           | Cuneal Cortex                      |
|                       | -4     | -84    | 26     | 8.52    | L           | Cuneal Cortex                      |
|                       | -6     | -76    | 22     | 8.29    | L           | Cuneal Cortex                      |
| 4222                  | -52    | -64    | 34     | 8.11    | L           | Superior Lateral Occipital Cortex  |
|                       | -50    | -64    | 42     | 7.97    | L           | Superior Lateral Occipital Cortex  |
|                       | -46    | -68    | 42     | 7.97    | L           | Superior Lateral Occipital Cortex  |
|                       | -52    | -58    | 46     | 7.47    | L           | Angular Gyrus                      |
|                       | -62    | -26    | -16    | 7.43    | L           | Middle Temporal Gyrus              |
| 2111                  | 62     | -26    | -10    | 5.74    | R           | Middle Temporal Gyrus              |
|                       | 60     | -30    | 0      | 5.74    | R           | Superior Temporal Gyrus            |
|                       | 60     | -20    | -22    | 5.19    | R           | Middle Temporal Gyrus              |
|                       | 70     | -22    | -6     | 5.06    | R           | Middle Temporal Gyrus              |
|                       | 56     | -30    | 6      | 5.06    | R           | Superior Temporal Gyrus            |

|      |    |     |    |      |   |                                   |
|------|----|-----|----|------|---|-----------------------------------|
| 1729 | 52 | -64 | 38 | 11.6 | R | Superior Lateral Occipital Cortex |
|      | 54 | -56 | 38 | 11.4 | R | Angular Gyrus                     |
|      | 60 | -44 | 44 | 5.6  | R | Supramarginal Gyrus               |
|      | 68 | -46 | 12 | 2.55 | R | Angular Gyrus                     |
|      | 68 | -40 | 14 | 1.78 | R | Supramarginal Gyrus               |

---

**Supplementary Table 3.**

**Areas of activation and deactivation for hits in the gist task.**

Contrasts of activity for hits versus baseline were averaged across young, old PIB+ and PIB- groups, controlling for voxelwise gray matter and performance. The average across groups was used to generate maps of task positive and task negative regions. Coordinates of local maxima within significant clusters are reported in MNI-space and regional labels were derived from the Harvard-Oxford Cortical Atlas.

| Cluster Size (voxels)  | X (mm) | Y (mm) | Z (mm) | Z-Score | Hemisphere | Region                             |
|------------------------|--------|--------|--------|---------|------------|------------------------------------|
| <i>Linear Increase</i> |        |        |        |         |            |                                    |
| 1952                   | -50    | -80    | -8     | 4.59    | L          | Inferior Lateral Occipital Cortex  |
|                        | -38    | -86    | 0      | 4.5     | L          | Inferior Lateral Occipital Cortex  |
|                        | -44    | -62    | -8     | 4.23    | L          | Inferior Temporal Gyrus            |
|                        | -34    | -78    | 8      | 4.14    | L          | Inferior Lateral Occipital Cortex  |
|                        | -38    | -68    | -12    | 4.11    | L          | Occipital Fusiform Gyrus           |
|                        | -42    | -72    | -10    | 4.05    | L          | Inferior Lateral Occipital Cortex  |
|                        | -48    | -76    | -8     | 3.69    | L          | Inferior Lateral Occipital Cortex  |
|                        | -52    | -60    | -10    | 3.66    | L          | Inferior Temporal Gyrus            |
|                        | -52    | -60    | -2     | 3.66    | L          | Middle Temporal Gyrus              |
|                        | -40    | -52    | -12    | 3.23    | L          | Temporal Occipital Fusiform Cortex |
| 1738                   | 42     | -56    | -16    | 4.04    | R          | Temporal Occipital Fusiform Cortex |
|                        | 42     | -60    | -14    | 4       | R          | Temporal Occipital Fusiform Cortex |
|                        | 42     | -48    | -18    | 3.91    | R          | Temporal Occipital Fusiform Cortex |
|                        | 48     | -70    | -10    | 3.89    | R          | Inferior Lateral Occipital Cortex  |
|                        | 52     | -54    | -8     | 3.68    | R          | Inferior Temporal Gyrus            |
|                        | 38     | -68    | -8     | 3.6     | R          | Occipital Fusiform Gyrus           |
|                        | 28     | -38    | -12    | 3.53    | R          | Lingual Gyrus                      |
|                        | 34     | -44    | -20    | 3.51    | R          | Temporal Occipital Fusiform Cortex |
|                        | 50     | -64    | -2     | 3.44    | R          | Inferior Lateral Occipital Cortex  |
|                        | 50     | -64    | 6      | 3.39    | R          | Inferior Lateral Occipital Cortex  |
| <i>Linear Decrease</i> |        |        |        |         |            |                                    |
| 4778                   | -12    | -2     | 48     | 4.76    | L          | Supplementary Motor Cortex         |
|                        | -6     | 28     | 18     | 4.28    | L          | Anterior Cingulate Gyrus           |
|                        | -16    | 14     | 38     | 4.26    | L          | Paracingulate Gyrus                |
|                        | 16     | -42    | 12     | 4.01    | R          | Right Hippocampus                  |
|                        | -32    | 18     | 4      | 3.81    | L          | Insular Cortex                     |
|                        | 3049   | 60     | -30    | -4      | 5.25       | R                                  |
| 64                     |        | -28    | -12    | 5.03    | R          | Middle Temporal Gyrus              |
| 56                     |        | -46    | 52     | 4.65    | R          | Angular Gyrus                      |
| 52                     |        | -58    | 50     | 4.28    | R          | Superior Lateral Occipital Cortex  |
| 50                     |        | -32    | 26     | 4.08    | R          | Parietal Operculum Cortex          |
| 1648                   | 2      | -72    | 40     | 4.28    | R          | Precuneous Cortex                  |
|                        | -2     | -72    | 34     | 4.06    | L          | Precuneous Cortex                  |
|                        | 2      | -76    | 30     | 3.93    | R          | Cuneal Cortex                      |
|                        | 10     | -66    | 34     | 3.83    | R          | Precuneous Cortex                  |
|                        | 10     | -78    | 48     | 3.73    | R          | Superior Lateral Occipital Cortex  |
| 1519                   | -50    | -30    | 8      | 4.2     | L          | Planum Temporale                   |
|                        | -56    | -44    | 22     | 3.89    | L          | Supramarginal Gyrus                |
|                        | -42    | -58    | 44     | 3.71    | L          | Angular Gyrus                      |
|                        | -60    | -46    | 24     | 3.6     | L          | Supramarginal Gyrus                |
|                        | -32    | -52    | 36     | 3.58    | L          | Angular Gyrus                      |

|      |    |    |    |      |   |                        |
|------|----|----|----|------|---|------------------------|
| 1128 | 42 | 26 | 36 | 4.32 | R | Middle Frontal Gyrus   |
|      | 46 | 18 | 48 | 3.87 | R | Middle Frontal Gyrus   |
|      | 44 | 32 | 38 | 3.83 | R | Middle Frontal Gyrus   |
|      | 46 | 10 | 52 | 3.67 | R | Middle Frontal Gyrus   |
|      | 28 | 22 | 56 | 3.54 | R | Superior Frontal Gyrus |

**Supplementary Table 4.**

**Areas displaying linear increases and decreases across detail level in the details task.**

Linear contrasts of activity for hits by detail level (Hit\_5/6 > Hit\_4 > Hit\_3 > Hit\_2 > Hit0/1) were modeled for young, old PIB+ and PIB- groups, controlling for gray matter and performance. The average across groups results in a map of parametric increases and parametric decreases across groups. Coordinates of local maxima within significant clusters are reported in MNI-space and regional labels were derived from the Harvard-Oxford Cortical Atlas.

| Cluster Size (voxels)      | Z-Score | X (mm) | Y (mm) | Z (mm) | Hemisphere | Region                             |
|----------------------------|---------|--------|--------|--------|------------|------------------------------------|
| <i>Young &gt; Old PIB-</i> |         |        |        |        |            |                                    |
| 8220                       | 5.1     | -14    | -56    | 18     | L          | Precuneous Cortex                  |
|                            | 4.92    | 36     | -98    | 6      | R          | Occipital Pole                     |
|                            | 4.79    | -6     | -66    | 40     | L          | Precuneous Cortex                  |
|                            | 4.72    | 4      | -76    | 42     | R          | Precuneous Cortex                  |
|                            | 4.62    | 2      | -36    | 18     | R          | Posterior Cingulate Gyrus          |
|                            | 4.55    | -42    | -68    | 24     | L          | Superior Lateral Occipital Cortex  |
|                            | 4.27    | -44    | -56    | 16     | L          | Angular Gyrus                      |
|                            | 4.18    | 14     | -64    | 40     | R          | Precuneous Cortex                  |
|                            | 4.11    | -24    | -74    | 52     | L          | Superior Lateral Occipital Cortex  |
|                            | 4.05    | 36     | -62    | 26     | R          | Superior Lateral Occipital Cortex  |
| 4600                       | 5.38    | 10     | 22     | -2     | R          | Right Caudate                      |
|                            | 5.21    | 56     | 16     | 4      | R          | Inferior Frontal Gyrus             |
|                            | 5.16    | 12     | 22     | 2      | R          | Right Caudate                      |
|                            | 5.03    | 36     | 48     | 28     | R          | Frontal Pole                       |
|                            | 4.4     | 20     | 10     | 12     | R          | Right Caudate                      |
|                            | 4.29    | 54     | 10     | 4      | R          | Precentral Gyrus                   |
|                            | 4.2     | 20     | 60     | 18     | R          | Frontal Pole                       |
|                            | 4.16    | 36     | 32     | -14    | R          | Frontal Orbital Cortex             |
|                            | 4.07    | 60     | 16     | 14     | R          | Inferior Frontal Gyrus             |
|                            | 3.83    | 34     | 36     | 42     | R          | Frontal Pole                       |
| 1674                       | 5.58    | -20    | -34    | -2     | L          | Left Thalamus                      |
|                            | 4.66    | -28    | -38    | -16    | L          | Temporal Fusiform Cortex           |
|                            | 4.44    | -28    | -18    | 20     | L          | Lingual Gyrus                      |
|                            | 4.44    | -24    | -42    | -8     | L          | Lingual Gyrus                      |
|                            | 4.27    | -26    | -52    | -16    | L          | Temporal Occipital Fusiform Cortex |
|                            | 3.74    | -30    | -26    | -16    | L          | Parahippocampal Gyrus              |
|                            | 3.7     | -40    | -42    | -16    | L          | Temporal Fusiform Cortex           |
|                            | 3.43    | -16    | -44    | -14    | L          | Lingual Gyrus                      |
|                            | 3.28    | -32    | -74    | -10    | L          | Occipital Fusiform Gyrus           |
|                            | 1389    | 5.05   | 42     | -44    | -14        | R                                  |
| 4.94                       |         | 20     | -35    | 2      | R          | Hippocampus                        |
| 4.94                       |         | 20     | -36    | 2      | R          | Parahippocampal Gyrus              |
| 4.77                       |         | 22     | -38    | -16    | R          | Parahippocampal Gyrus              |
| 4.29                       |         | 28     | -46    | -10    | R          | Temporal Occipital Fusiform Cortex |
| 4.27                       |         | 26     | -52    | -16    | R          | Temporal Occipital Fusiform Cortex |
| 4.24                       |         | 20     | -32    | 2      | R          | Right Thalamus                     |
| 4.13                       |         | 22     | -50    | -14    | R          | Temporal Occipital Fusiform Cortex |
| 3.98                       |         | 36     | -62    | -4     | R          | Occipital Fusiform Gyrus           |
| 3.83                       |         | 46     | -50    | -10    | R          | Inferior Temporal Gyrus            |
| <i>PIB+ &gt; Old PIB-</i>  |         |        |        |        |            |                                    |
| 1568                       | 5.85    | -12    | -56    | 42     | L          | Precuneous Cortex                  |

|      |      |     |     |    |   |                                   |
|------|------|-----|-----|----|---|-----------------------------------|
|      | 5.14 | -10 | -60 | 44 | L | Precuneous Cortex                 |
|      | 4.22 | 32  | -62 | 26 | R | Superior Lateral Occipital Cortex |
|      | 3.88 | 30  | -58 | 34 | R | Superior Lateral Occipital Cortex |
|      | 3.79 | -20 | -34 | 64 | L | Postcentral Gyrus                 |
|      | 3.58 | 8   | -44 | 64 | R | Precuneous Cortex                 |
|      | 3.49 | -20 | -34 | 58 | L | Postcentral Gyrus                 |
|      | 3.42 | 8   | -40 | 66 | R | Postcentral Gyrus                 |
|      | 3.35 | 34  | -56 | 36 | R | Angular Gyrus                     |
|      | 3.1  | -24 | -80 | 32 | L | Superior Lateral Occipital Cortex |
| 1343 | 4.45 | 54  | 30  | 24 | R | Middle Frontal Gyrus              |
|      | 4.33 | 40  | 46  | 28 | R | Middle Frontal Gyrus              |
|      | 3.85 | -16 | 68  | 12 | L | Frontal Pole                      |
|      | 3.74 | -10 | 70  | 14 | L | Frontal Pole                      |
|      | 3.67 | 64  | 12  | 22 | R | Precentral Gyrus                  |
|      | 3.56 | 32  | 54  | 28 | R | Frontal Pole                      |
|      | 3.51 | 62  | 22  | 22 | R | Precentral Gyrus                  |
|      | 3.3  | 38  | 38  | 44 | R | Frontal Pole                      |
|      | 3.26 | 28  | 58  | 26 | R | Frontal Pole                      |
|      | 3.05 | 48  | 26  | 36 | R | Middle Frontal Gyrus              |
| 1185 | 4.75 | 42  | -34 | 62 | R | Postcentral Gyrus                 |
|      | 3.92 | 52  | -32 | 54 | R | Supramarginal Gyrus               |
|      | 3.76 | 36  | -20 | 66 | R | Precentral Gyrus                  |
|      | 3.58 | 42  | -22 | 64 | R | Precuneous Cortex                 |
|      | 3.51 | 50  | -38 | 56 | R | Precentral Gyrus                  |
|      | 3.4  | 50  | -10 | 54 | R | Precentral Gyrus                  |
|      | 3.1  | 60  | -26 | 44 | R | Supramarginal Gyrus               |
|      | 3.07 | 42  | -12 | 58 | R | Precentral Gyrus                  |
|      | 3    | 38  | -22 | 26 | R | Parietal Operculum Cortex         |
|      | 2.82 | 40  | -30 | 36 | R | Supramarginal Gyrus               |
| 1170 | 4.27 | 2   | 32  | 28 | R | Paracingulate Gyrus               |
|      | 4.15 | -36 | 0   | 58 | L | Middle Frontal Gyrus              |
|      | 3.81 | 6   | 32  | 32 | R | Paracingulate Gyrus               |
|      | 3.37 | -42 | -8  | 60 | L | Precentral Gyrus                  |
|      | 3.35 | 4   | 22  | 36 | R | Paracingulate Gyrus               |
|      | 3.33 | -30 | 30  | 48 | L | Middle Frontal Gyrus              |
|      | 3.23 | 4   | 0   | 42 | R | Anterior Cingulate Gyrus          |
|      | 3.07 | -2  | 4   | 34 | L | Anterior Cingulate Gyrus          |
|      | 3.03 | -32 | 18  | 58 | L | Middle Frontal Gyrus              |
|      | 3.03 | -32 | 26  | 50 | L | Middle Frontal Gyrus              |

**Supplementary Table 5.**

**Age and PIB effects in the gist task.**



Contrasts of activity for hits versus baseline were compared between young and old PIB– groups to test for age effect, and between old PIB+ and PIB– groups to test for the PIB effect. All comparisons controlled for gray matter and performance, and the test of PIB effect additionally controlled for age. Coordinates of local maxima within significant clusters are reported in MNI-space and regional labels were derived from the Harvard-Oxford Cortical Atlas.

| Cluster Size (voxels)         | Z-score | X (mm) | Y (mm) | Z (mm) | Hemisphere | Region                            |                |
|-------------------------------|---------|--------|--------|--------|------------|-----------------------------------|----------------|
| <i>Young &gt; Old PIB-</i>    |         |        |        |        |            |                                   |                |
| 11323                         | 5.58    | -32    | -76    | 12     | L          | Superior Lateral Occipital Cortex |                |
|                               | 5.14    | 36     | -84    | 18     | R          | Superior Lateral Occipital Cortex |                |
|                               | 5.12    | -40    | -68    | 10     | L          | Inferior Lateral Occipital Cortex |                |
|                               | 4.9     | 34     | -84    | 14     | R          | Superior Lateral Occipital Cortex |                |
|                               | 4.84    | 20     | -48    | 54     | R          | Superior Lateral Occipital Cortex |                |
|                               | 4.68    | -32    | -70    | 8      | L          | Inferior Lateral Occipital Cortex |                |
|                               | 4.58    | 56     | -66    | -12    | R          | Inferior Lateral Occipital Cortex |                |
|                               | 4.53    | 50     | -42    | -20    | R          | Inferior Temporal Gyrus           |                |
|                               | 4.49    | -22    | -68    | 36     | L          | Superior Lateral Occipital Cortex |                |
|                               | 4.38    | -6     | -42    | 56     | L          | Precuneus Cortex                  |                |
|                               | 1410    | 4.23   | -28    | -4     | 6          | L                                 | Left Putamen   |
|                               |         | 3.9    | 2      | -28    | 2          | R                                 | Right Thalamus |
|                               |         | 3.9    | 34     | -14    | -10        | R                                 | Right Putamen  |
|                               |         | 3.79   | -30    | -16    | -2         | L                                 | Left Putamen   |
| 3.77                          |         | -18    | 4      | 14     | L          | Left Caudate                      |                |
| 3.66                          |         | 12     | -34    | 2      | R          | Posterior Cingulate Gyrus         |                |
| 3.46                          |         | 36     | -12    | -14    | R          | Right Hippocampus                 |                |
| 3.39                          |         | -20    | 10     | 8      | L          | Left Putamen                      |                |
| 3.35                          |         | -8     | -20    | 10     | L          | Left Thalamus                     |                |
| 3.26                          |         | -16    | -26    | -6     | L          | Left Thalamus                     |                |
| <i>Old PIB+ &gt; Old PIB-</i> |         |        |        |        |            |                                   |                |
| 4732                          | 4.19    | -20    | -56    | 58     | L          | Superior Parietal Lobule          |                |
|                               | 4.01    | -2     | -60    | 30     | L          | Precuneus Cortex                  |                |
|                               | 4.01    | 42     | -44    | 34     | R          | Supramarginal Gyrus               |                |
|                               | 3.98    | 50     | -30    | 44     | R          | Postcentral Gyrus                 |                |
|                               | 3.93    | 24     | -42    | 62     | R          | Postcentral Gyrus                 |                |
|                               | 3.9     | -10    | -44    | 30     | L          | Postcentral Gyrus                 |                |
|                               | 3.81    | 26     | -68    | 32     | R          | Superior Lateral Occipital Cortex |                |
|                               | 3.77    | -4     | -42    | 58     | L          | Angular Gyrus                     |                |
|                               | 3.73    | 48     | -70    | 28     | R          | Angular Gyrus                     |                |
|                               | 3.7     | 42     | -50    | 36     | R          | Angular Gyrus                     |                |

**Supplementary Table 6.**

**Age and PIB effects in the details task.**

Linear contrasts of activity for hits by detail level (Hit\_5/6 > Hit\_4 > Hit\_3 > Hit\_2 > Hit0/1) were compared between young and old PIB- groups to test for the age effect, and between the old PIB+ and PIB- groups to test for the PIB effect. All comparisons controlled for gray matter and performance, and the test of PIB effect additionally controlled for age. Coordinates of local maxima within significant clusters are reported in MNI-space and regional labels were derived from the Harvard-Oxford Cortical Atlas.
